# Supplementary material for: The determinants of dietary diversity and nutrition: ethnonutrition knowledge of local people in the East Usambara Mountains, Tanzania
Source: Springer Nature journal article supplement (doi:10.1186/s13002-017-0150-2), 2017-04-27

# - Info Brief -

## Mlo na Lishe Bora kwa Milima ya Usambara Mashariki

**Mbinu:** Takwimu zilizokusanywa mwaka 2009 katika vijiji 6 (Bombani, Tongwe, Kiwanda, Kwatango, Shambangeda, Misalai) kutoka kaya N = 274 (mama na watoto wenye umri wa miaka 2-5)

**Virutubishi ulaji:** Virutubishi vyenye uwezekano wa kuwa upungufu (chini mno), kipimwa kama vyenye uwiano wa chini kukidhi mahitaji kwa (nutrient adequacy ratios (NARs) – ulaji wa watoto / USDA mapendekezo kwa umri)

Virutubishi vyenye uwezekano mkubwa zaidi kuwa pungufu katika mlo wa watoto (kwa mpangilio umuhimu):

- Zinc
- Vitamini B<sub>12</sub>
- Vitamini A
- Calcium
- Chuma

**Ukuaji wa Watoto:** Kiwaneo cha kudumaa ('Stunting' = urefu-kwa-umri Z score (HAZ) <-2 SD, inajihhirisha kama ukuaji usioridhisha ilinganishwa na viwango vya kimataifa (WHO) vya ukuaji curves).

- Wastani HAZ = -1.73 ± 1.23
- 39% ya watoto wamedumaa
- Watoto wanaotuma maji ya bomba walikuwa na uwezekano mdogo wa kudumaa kuwa ikilinganishwa na wanaotumia maji ya chemchemi/ mtoni (31% vs. 58% kudumaa, p=0.001)
- Hakuna tofauti kati ya wavulana na wasichana
- Vipimo vya ubora wa mlo na lishe bora havikuwa uhusiano kitakwimu na ukuaji wa watoto

**Kubadilisha Mlo:** Ufahamu wa asilia unaonyesha kuwa kubadilisha mlo ni muhimu katika kuhakikisha hamu ya chakula, hasa kwa watoto.

Matokeo ya utafiti yanaonesh kwamba ubadiisha wa milo kwa watoto (FVS, DDS<sub>14</sub> over 1 day and 7 days and DDS<sub>6</sub> over 1 day) inawiana na ulaji wa virutubishi kwa kiwaneo kikubwa zaidi

FVS: Nambari ya aina ya vyakula  
 DDS<sub>6</sub>: Nambari ya makundi ya vyakula, katika 6  
 DDS<sub>14</sub>: Nambari ya makundi ya vyakula, katika 14

### Viashiria vya Ubora ujumla wa Mlo:

Ubora ujumla wa mlo kipimo kwa MAR (mean adequacy ratio, wastani ya NARs ya virutubishi 11)

Ubora ujumla wa mlo (MAR) juu ilikuwa uhusiano na:

- Kukula mboga mboga zaidi
- Kukula nyama, kuku na samaki bichi zaidi
- Kukula chini ya vyakula kununuliwa
- Kubadilisha mlo zaidi

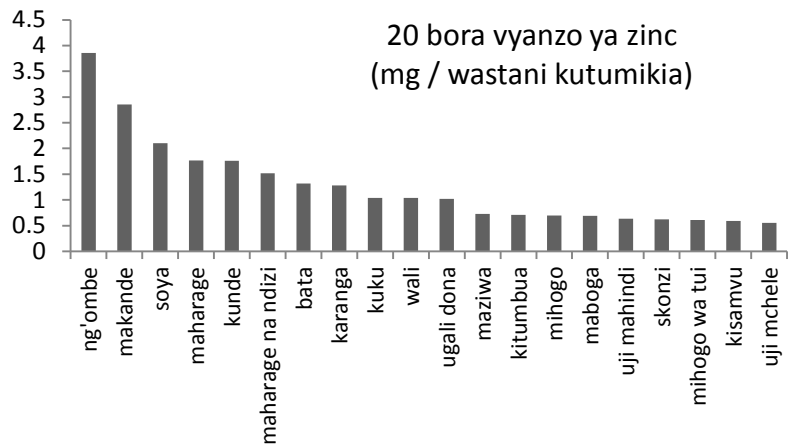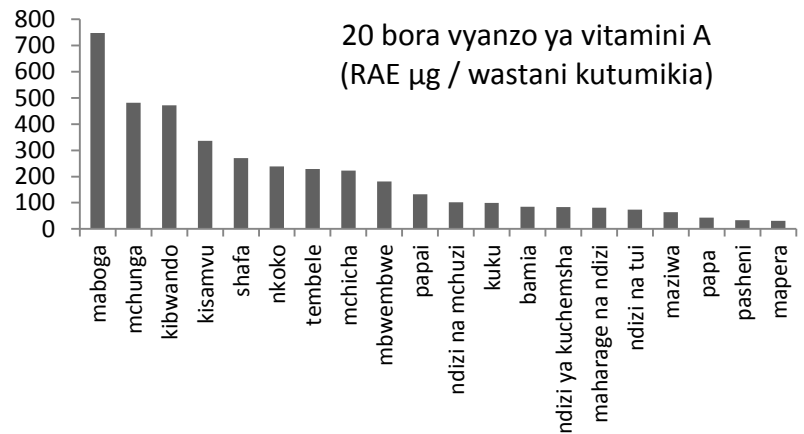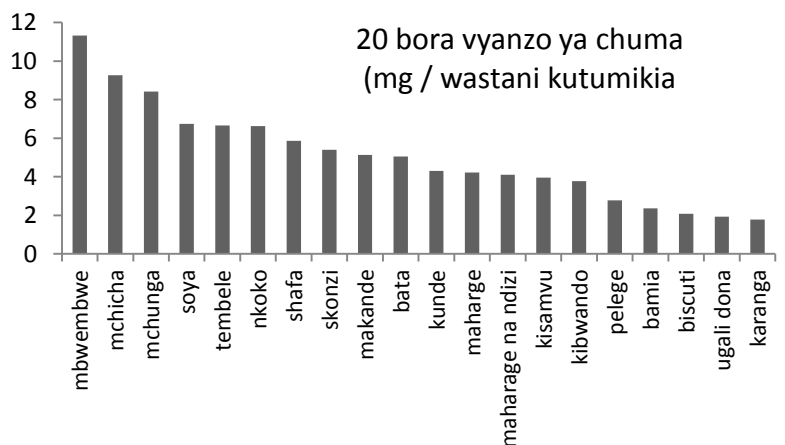

Supplement: MOESM2 [file 12252948]
